# Supplementary material
Source: HighWire-hosted journal article supplement (http://www.qdcxjkg.com/highwire/filestream/126480/field_highwire_adjunct_files/1/supplement_5.pdf)
Supplement: supplement_5.pdf [file supplement_5.pdf]

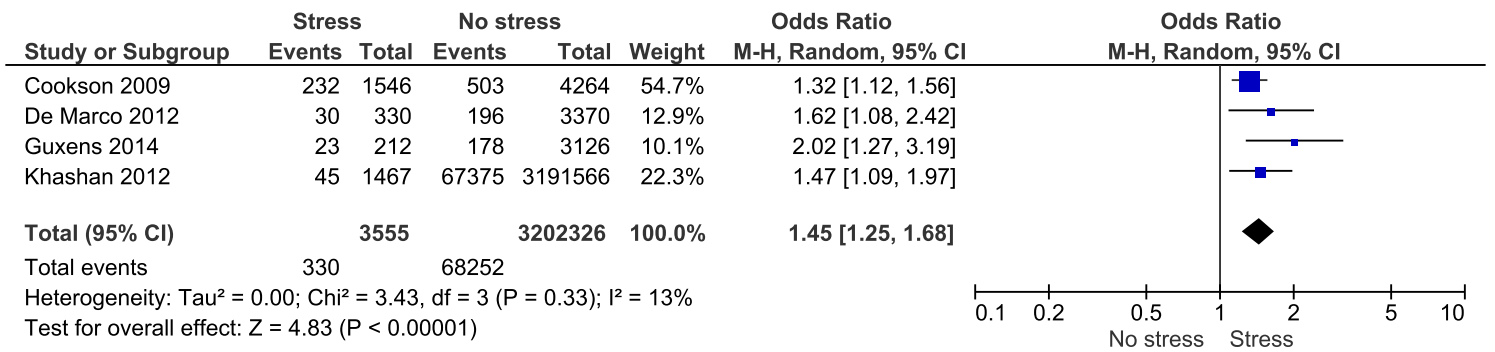

**S5:** Forest plot of the meta-analysis (dichotomous measures) on the association between any form of prenatal maternal psychological stress and childhood asthma.
